# Supplementary material for: Common Genetic Origins for EEG, Alcoholism and Anxiety: The Role of CRH-BP
Source: PLoS One. 2008 Oct 31;3(10):e3620. doi: 10.1371/journal.pone.0003620 (PMC2575401; doi:10.1371/journal.pone.0003620)
Supplement: Materials S1 — Further results from the genome linkage scan. Presentation of results showing suggestive linkage peaks and discussion of potential candidate genes. (0.04 MB DOC) [file pone.0003620.s001.doc]

**SUPPLEMENTARY MATERIALS**

**Common Genetic Origins for EEG, Alcoholism and Anxiety: the Role of *CRH-BP***

Mary-Anne Enoch 1, Pei-Hong Shen1, Francesca Ducci1, Qiaoping Yuan1, Jixia Liu1, Kenneth V. White1, Bernard Albaugh2, Colin A. Hodgkinson1 and David Goldman1

1Laboratory of Neurogenetics, National Institute on Alcohol Abuse and Alcoholism, NIH, Bethesda, MD 20892, USA.

2 Center for Human Behavior Studies, Inc, Weatherford, OK 73096, USA.

Corresponding author:

Mary-Anne Enoch M.D.

NIH/NIAAA/DICBR/LNG

5625 Fishers Lane, Room 3S32, MSC 9412

Bethesda, MD 20892-9412

Tel: 301-496-2727

Fax: 301-480-2839

email: [maenoch@niaaa.nih.gov](mailto:maenoch@niaaa.nih.gov)

**Results from the whole genome linkage scan**

***Suggestive Linkage (LOD > 2.0):***

We found suggestive evidence for linkage that was specific to particular EEG frequency bands: theta on chr 22 (LOD = 3.2) and on chr 4 (LOD = 2.5); alpha on chr 4 (LOD = 2.4) and on chr 11 (LOD = 2.2) and beta on chr 10 (LOD = 2.5) and on chr 2 (LOD = 2.1).

***Chromosome 22***

There was a linkage peak for theta EEG power at O1 with a LOD score of 3.2 (empirical p = 0.0001) at 20 cM (Table 2, Figure 2).

*Candidate genes*

There are 325 genes in the region of the peak with a LOD score of > 2.0 (4 – 26 cM; 16.5 – 25.3 Mbp). The majority of these are immunoglobulin genes (20.7 – 21.5 Mbp). Based upon gene function there were three likely candidate genes in the region, all located at sites with a maximum LOD score of 2.3: adenosine A2a receptor (*ADORA2A,* MIM 102776) (19cM); mitogen activated protein kinase 1 (*MAPK1,* MIM 176948) (14 cM) and catechol –O-methyltransferase (*COMT,* MIM 116790) (10 cM).

***Chromosome 4***

There were linkage peaks for theta EEG power at O1 (LOD = 2.5 at 40 cM) and alpha power at O2 (LOD = 2.4 at 48 cM) (Table 2, Figure 2).

*Candidate genes*

There were 56 genes in region of the linkage peak for theta EEG power at O1 that had a LOD score of > 1.5 (30 – 47 cM; 15.2 – 27.4 Mbp). The gene for the cholecystokinin A receptor (*CCKAR,* MIM 118444) is located within the peak at 45.5 CM, with a LOD score of 1.7. There were 52 genes in the overlapping peak region for alpha power at O2. The only likely candidate gene at this location is *CCKAR*.

***Chromosomes 10 and 2***

There was a linkage peak for beta power at O1 at 110 cM, LOD = 2.5 (Figure 2).

*Candidate genes*

There were 89 genes in the region (103 – 113 cM, 83.8 – 95.4 Mbp) under the peak with a LOD score of > 1.5. Candidate genes include the serotonin receptor 7 (*HTR7,* MIM 182137) (111 cM) and glutamate dehydrogenase 1 (*GLUD1,* MIM 138130) at 107.5 cM.

There was also a linkage peak for beta power at O1 on chr 2 (244 cM) with a LOD score of 2.1. A candidate gene in this area is serotonin receptor 2B (*HTR2B,* MIM 601122) at 238 cM.

***Chromosome 11***

There was a linkage peak for alpha power at P3 (LOD = 2.2), 114 cM (Figure 2).

*Candidate genes*

There were 66 genes in the region (109 – 117 cM; 109.7 – 116.3 Mbp) under the peak for alpha power at LOD > 1.5). There were four strong candidate genes located close together near the apex of the linkage peak (114 cM): serotonin receptors 3A and 3B (*HTR3A* [MIM 182139] and *HTR3B* [MIM 604654]) at 113.2 cM, dopamine receptor 2 (*DRD2*, MIM 126450) and ankyrin repeat and kinase domain containing 1 (*ANKKI*, MIM 608774) at 112.7 cM.

**Candidate genes for further study**

We identified other candidate genes that will be explored in later analyses. *HOMER1*, located close to the linkage peak on chr 5, is a synaptic scaffolding protein that regulates signal transduction and synaptogenesis; preclinical studies indicate that it may have a role in addiction, anxiety and epilepsy [S1]. *ADORA2A*, a major target of caffeine that has recently been implicated in alcoholism [S2] was located close to the apex of the theta linkage peak on chr 22 (LOD = 3.2) whereas *COMT*, previously associated with the low voltage alpha EEG phenotype [S3] was located more peripherally. *CCKAR*, located at the apex of the linkage peaks for alpha and theta power on chr 4 (LOD = 2.5) is a G-protein-coupled receptor that regulates the release of beta endorphin and dopamine in the CNS and is implicated in stress. Linkage peaks identified several serotonin receptors as candidate genes: *HTR7* (chr 10), *HTR3A* and *HTR3B* (chr 11), *HTR2B* (chr 2) and *HTR1A* (chr 5). *DRD2* and *ANKKI* were also located at the apex of the peak on chr 11*.*

**REFERENCES**

S1. Szumlinski KK, Kalivas PW, Worley PF (2006) Homer proteins: implications for neuropsychiatric disorders. Curr Opin Neurobiol 16: 251-257.

S2. Thorsell A, Johnson J, Heilig M (2007) Effect of the adenosine A2a receptor antagonist 3,7-dimethyl-propargylxanthine on anxiety-like and depression-like behavior and alcohol consumption in Wistar Rats. Alcohol Clin Exp Res 31: 1302-1307.

S3. Enoch MA, Xu K, Ferro E, Harris CR, Goldman D (2003) Genetic origins of anxiety in women; a role for a functional COMT polymorphism. Psychiatr Genet 13: 33-41.

**FIGURE S1**

**Linkage Peaks for Resting EEG Power on Chromosomes 22, 4, 10 and 11 and Locations of Candidate Genes.**

EEG power frequency bands: theta (3 – 8 Hz), alpha (8 – 13 Hz) and beta (13 – 30 Hz).

O1, O2 = occipital electrodes; P3, PZ, P4 = parietal electrodes. FZ = frontal-central electrode. GABAA receptor complex: gene cluster for GABAA receptors. *CCKAR* = cholecystokinin A receptor gene; *HTR7* = serotonin receptor 7 gene; *HTR3A* and *HTR3B* = serotonin receptor 3A and 3B genes. *DRD2* = dopamine receptor 2 gene. *ANKKI* = ankyrin repeat and kinase domain containing 1 gene.

**FIGURE S2**

**Illustration of Method for Eliminating SNPs that are in Linkage Disequilibrium**

Red diamonds indicate linkage disequilibrium (LD) (D’ > 0.5) between SNPs. All markers in LD were eliminated (N = 1983) resulting in 3878 unlinked SNPs that were used in the linkage analyses.
